# Supplementary material for: Comparative Analysis of Carbon Sequestration in Mangrove Forests of Saudi Arabia's Eastern Province
Source: Research Square preprint supplement (doi:10.21203/rs.3.rs-8827183/v1), 2026-02-18
Supplement: Supplementary file 1 [file 1d166e9b926fd749635f1206.docx]

**Table 1. Soil Organic Carbon Characteristics by depth for samples collected from Tarut Island**

| Sample no | Depth (cm) | BD (g/cm³) | SOC (g/kg) | SOC Density (kg/m³) |
| --- | --- | --- | --- | --- |
| 1 | 0-5 | 0.975 | 26.287 | 25.624 |
| 2 | 6-10 | 1.302 | 21.705 | 28.268 |
| 3 | 11-15 | 1.252 | 16.993 | 21.269 |
| 4 | 16-20 | 1.242 | 16.829 | 20.905 |
| 5 | 21-25 | 1.230 | 15.037 | 18.491 |
| 6 | 26-30 | 1.174 | 15.358 | 18.024 |
| 7 | 31-35 | 1.981 | 14.312 | 28.346 |

The average bulk density is **1.31** g/cm³; profile. Based on the estimates, the soil carbon density is 22.99 kg/m³.

**Table 2. Soil Organic Carbon Characteristics by depth for samples collected from Ras Tanura**

| Sample No | Depth (cm) | BD (g/cm³) | SOC (g/kg) | SOC Density (kg/m³) |
| --- | --- | --- | --- | --- |
| 1 | 0-5 | 0.684 | 41.819 | 28.591 |
| 2 | 6-10 | 1.361 | 12.246 | 16.666 |
| 3 | 11-15 | 1.510 | 9.148 | 13.814 |
| 4 | 16-20 | 1.420 | 7.290 | 10.354 |
| 5 | 21-25 | 1.572 | 6.792 | 10.679 |
| 6 | 26-30 | 1.501 | 6.228 | 9.350 |
| 7 | 31-35 | 1.579 | 5.734 | 9.054 |

**Table 3. Soil Organic Carbon Characteristics by depth for samples collected from Safwa**

| Sample No | Depth (cm) | BD (g/cm³) | SOC (g/kg) | SOC Density (kg/m³) |
| --- | --- | --- | --- | --- |
| 1 | 0-5 | 1.423 | 14.061 | 20.003 |
| 2 | 6-10 | 1.260 | 10.365 | 13.058 |
| 3 | 11-15 | 1.850 | 8.763 | 16.207 |
| 4 | 16-20 | 1.715 | 7.725 | 13.251 |
| 5 | 21-25 | 1.703 | 5.487 | 9.346 |
| 6 | 26-30 | 1.616 | 6.076 | 9.816 |
| 7 | 31-35 | 1.325 | 7.878 | 10.440 |

**Table 4. Summary of soil organic carbon (SOC) characteristics across the three study sites**

| Location | Mean BD (g/cm³) | Mean SOC (g/kg) | SOC Density (kg/m³) | SOC Stock (t C/ha) |
| --- | --- | --- | --- | --- |
| Tarut Island | 1.31 | 18.1 | 22.99 | 48.5 |
| Safwa | 1.56 | 8.6 | 13.2 | 63.4 |
| Ras Tanura | 1.58 | 12.7 | 14.1 | 84.8 |

**Table 5. Plant organic carbon (POC), soil organic carbon stock (SOC stock), and total carbon stock across the three study sites**

| Location | POC (t C/ha) | SOC Stock (t C/ha) | Total carbon (t C/ha) | Order |
| --- | --- | --- | --- | --- |
| Tarut Island | 14.341 | 48.5 | 62.8 | 3 |
| Safwa | 17.168 | 63.4 | 80.6 | 2 |
| Ras Tanura | 21.417 | 84.8 | 106.2 | 1 |

Table 6: Comparison of bulk density and soil carbon attributes of Tarout Island, Safwa, and Ras Tanura.

| Variable | Tarout Island (Mean ± SE) | Safwa (Mean ± SE) | Ras Tanura (Mean ± SE) | F-value | P-value |
| --- | --- | --- | --- | --- | --- |
| POC (t C/ha) | 14.34 ± 0.5 | 17.17 ± 0.6 | 21.42 ± 0.7 | 45.23 | < 0.001 |
| BD (g/cm³) | 1.24 ± 0.14 | 1.56 ± 0.12 | 1.38 ± 0.18 | 38.67 | < 0.001 |
| SOC (g/kg) | 18.5 ± 2.1 | 8.6 ± 1.1 | 12.7 ± 4.5 | 52.41 | < 0.001 |
| SOC Stock (t/ha) | 48.5 ± 3.2 | 63.4 ± 4.1 | 84.8 ± 5.8 | 41.19 | < 0.001 |
| Total carbon | 62.8 ± 3.7 | 80.6 ± 4.7 | 106.2 ± 6.5 | 50.88 | < 0.001 |

Table 7 Results of pairwise comparisons of soil and carbon variables among the three study sites.

| Variable | Comparison | Difference | P-value |
| --- | --- | --- | --- |
| POC | Ras Tanura vs Tarout | +7.08 | < 0.001 |
|  | Ras Tanura vs Safwa | +4.25 | < 0.01 |
|  | Safwa vs Tarout | +2.83 | < 0.05 |
| SOC Stock | Ras Tanura vs Tarout | +36.3 | < 0.001 |
|  | Ras Tanura vs Safwa | +21.4 | < 0.01 |
|  | Safwa vs Tarout | +14.9 | < 0.05 |
| Total carbon | Ras Tanura vs Tarout | +43.4 | < 0.001 |
|  | Ras Tanura vs Safwa | +25.6 | < 0.001 |
|  | Safwa vs Tarout | +17.8 | < 0.01 |
